# Supplementary material for: SIRT1 Promotes N-Myc Oncogenesis through a Positive Feedback Loop Involving the Effects of MKP3 and ERK on N-Myc Protein Stability
Source: PubMed Central journal article supplement (PMC3116909; doi:10.1371/journal.pgen.1002135), 2011-06-16

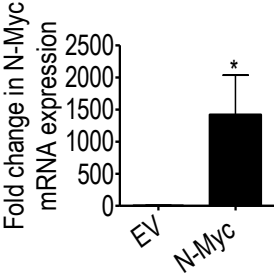

Supplement: pgen.1002135.s001.pdf [file pgen.1002135.s001.pdf]
